# Supplementary material for: The Human Homolog of Escherichia coli Endonuclease V Is a Nucleolar Protein with Affinity for Branched DNA Structures
Source: PubMed Central journal article supplement (PMC3489907; doi:10.1371/journal.pone.0047466), 2012-11-05
Supplement: pone.0047466.s005.pdf [file pone.0047466.s005.pdf]

**Table S1. Oligonucleotides for probes and real time-PCR**

| <b>Primer:</b> | <b>Sequence 5' → 3':</b>   | <b>Description:</b>              |
|----------------|----------------------------|----------------------------------|
| 1              | TTGACGTGTCCTTCGTGAAA       | Fwd exon 2 RT-PCR                |
| 2              | ATGCGGCTCTCCTCATACAC       | Rev exon 3 RT-PCR                |
| 3              | ACTGTCCTGGGAATGGC          | Fwd exon 6/7 RT-PCR, tissue-scan |
| 4              | ACTTGCGGATGTGCTCTCG        | Rev exon 8 RT-PCR, tissue-scan   |
| 5              | CCACATCGCTCAGACACCAT       | Fwd GAPDH RT-PCR                 |
| 6              | GCGCCCAATACGACCAAAT        | Rev GAPDH RT-PCR                 |
| 7              | GTGGTGTATGAGGAGAGCCG       | Fwd exon 3 Northern              |
| 8              | CTGGGGCATGAGGCCCG          | Rev exon3 Northern               |
| 9              | CCTTCTTGTGGATGGAAACGGGGTAC | Fwd exon 4 Northern              |
| 10             | AGCGACTTGCGGATGTGCTCTCG    | Rev exon 8 Northern              |
| 11             | TGGTGGTGAGAGCACACGTC       | Fwd exon 10 Northern             |
| 12             | GGACCGTCTTCAGCTGGATG       | Rev exon 10 Northern             |
