# Supplementary material for: The Human Homolog of Escherichia coli Endonuclease V Is a Nucleolar Protein with Affinity for Branched DNA Structures
Source: PubMed Central journal article supplement (PMC3489907; doi:10.1371/journal.pone.0047466), 2012-11-05
Supplement: pone.0047466.s006.pdf [file pone.0047466.s006.pdf]

**Table S2. Oligonucleotides for DNA substrates**

| <b>Primer:</b> | <b>Sequence 5' → 3':</b>                                      | <b>Description:</b>                       |
|----------------|---------------------------------------------------------------|-------------------------------------------|
| 1              | CGGTGACCGATCTGTAGCTCTACGG                                     | Complementary oligo for ds control and Hx |
| 2              | CCGTAGAGCTACAGATCGGTCACCG                                     | ds control*                               |
| 3              | CCGTAGAGCTAC[Hx]GATCGGTCACCG                                  | Hypoxanthine*                             |
| 4              | GCATGCCTGCACGG[U]CATGGCCAGATCCCCGGGTACCGAG                    | Uracil*                                   |
| 5              | CTCGGTACCCGGGGATCTGGCCATGGCCGTGCAGGCATGC                      | Complementary G for uracil                |
| 6              | CCGTAGAGCGACAGATCGGTCACCG                                     | Complementary for loop (A)*               |
| 7              | CGGTGACCGATCTTGTGCTCTACGG                                     | Loop (TT)                                 |
| 8              | TCAACTCTGGAATAAGTGCCTGGTCCGGT                                 | Complementary oligo for hairpin*          |
| 9              | ACCGACCACGCACTGCGCGTTTTTCGCGCTATTCCAGAGTTGA                   | Hairpin                                   |
| 10             | GGATACGTAACAACGCTTATGCATCGCCGCCGCTACATCCCTGAGCTGAC            | 3'-flap, 5'-flap, 3-way*, pseudo-Y*, fork |
| 11             | ATGCATAAGCGTTGTTACGTATCC                                      | 3'-flap, fork                             |
| 12             | GTCAGCTCAGGGATGTAGCGGCGG                                      | 5'-flap                                   |
| 13             | TGTGTTTCGATCTCGATCAGAATGACGATGCATAAGCGTTGTTACGTATCC           | 5'-flap*, 3-way, pseudo-Y                 |
| 14             | GTCAGCTCAGGGATGTAGCGGCGGAGTCATTCTGATCGAGATCGAACACA            | 3'-flap*, 3-way, fork*                    |
| 15             | TGTGTTTCGATCTCGATCAGAATGA                                     | fork                                      |
| 16             | CCGCTACCAGTGATCACCAATGGATTGCTAGGACATCTTTGCCACCTGCAGGTTACCC    | HJ_1                                      |
| 17             | TGGGTGAACCTGCAGGTGGGCAAAGATGTCCTAGCAATCCATTGTCTATGACGTCAAGCT  | HJ_2*                                     |
| 18             | GAGCTTGACGTCATAGACAATGGATTGCTAGGACATCTTTGCCGTCTTGTCAATATCGGC  | HJ_3                                      |
| 19             | TGCCGATATTGACAAGACGGCAAAGATGTCCTAGCAATCCATTGGTGATCACTGGTAGCGG | HJ_4                                      |

\* = <sup>32</sup>P labelled strand
