# Supplementary material for: The Human Homolog of Escherichia coli Endonuclease V Is a Nucleolar Protein with Affinity for Branched DNA Structures
Source: PubMed Central journal article supplement (PMC3489907; doi:10.1371/journal.pone.0047466), 2012-11-05
Supplement: pone.0047466.s007.pdf [file pone.0047466.s007.pdf]

**Table S3. Evaluation of the evolutionary selective pressure acting on ENDOV.** Ratio of amino acid replacing ( $K_a$ ) and silent ( $K_s$ ) mutation rates for pairwise comparisons of the endonuclease V core regions and C-terminal tails from mouse (GenBank [1] identifier NM\_001164636), rat (Ensembl [2] transcript ENSRNOT0000054986) and hamster (XM\_003496871) *ENDO V*. These species were selected for analysis because the mRNAs are processed by identical splicing of the same nine exons in the three rodents, simplifying analysis.  $K_s$  is the number of synonymous substitutions per synonymous site and  $K_a$  is the number of amino acid changing substitutions per non-synonymous site [3]. The calculation of the  $K_a/K_s$  ratio is a powerful tool for evaluating evolutionary selective pressure, with  $K_a/K_s < 1$  indicating purifying (negative) selection, while  $K_a/K_s \sim 1$  is indicating neutral evolution of the protein segment.

|                      | $K_a/K_s^a$          |                      |
|----------------------|----------------------|----------------------|
|                      | <i>Mm</i> ENDOV core | <i>Rn</i> ENDOV core |
| <i>Rn</i> ENDOV core | 0.129 (0.123)        |                      |
| <i>Cg</i> ENDOV core | 0.233 (0.230)        | 0.214 (0.210)        |

  

|                        | $K_a/K_s^b$            |                        |
|------------------------|------------------------|------------------------|
|                        | <i>Mm</i> ENDOV C-term | <i>Rn</i> ENDOV C-term |
| <i>Rn</i> ENDOV C-term | 1.424 (1.457)          |                        |
| <i>Cg</i> ENDOV C-term | 1.087 (1.137)          | 1.752 (1.880)          |

<sup>a</sup> $K_a/K_s$  ratios for pairwise comparisons of ENDOV from mouse (*Mm*), rat (*Rn*), and Chinese hamster (*Cg*) for the core region (residues 1-250) calculated according to the model of Goldman and Yang [4] and the model averaging method of Zhang *et al.* (in parenthesis) [5] with the KaKs\_Calculator [6].

<sup>b</sup> $K_a/K_s$  ratios for pairwise comparisons of the C-terminal segments (codon 251 – stop) of ENDOV for the three rodents calculated as described above. Sites corresponding to insertions/deletions were removed.

### Supporting Table S3 Reference List

1. Benson DA, Karsch-Mizrachi I, Clark K, Lipman DJ, Ostell J, and Sayers EW (2012) GenBank. Nucleic Acids Res 40: D48-D53.
2. Flicek P, Amode MR, Barrell D, Beal K, Brent S, *et al.* (2012) Ensembl 2012. Nucleic Acids Res 40: D84-D90.

3. Hurst LD (2002) The *Ka/Ks* ratio: diagnosing the form of sequence evolution. *Trends Genet* 18: 486-487.
4. Goldman N and Yang Z (1994) A codon-based model of nucleotide substitution for protein-coding DNA sequences. *Mol Biol Evol* 11: 725-736.
5. Zhang Z, Li J, Zhao XQ, Wang J, Wong GK, Yu J (2006) KaKs\_Calculator: calculating *Ka* and *Ks* through model selection and model averaging. *Genomics Proteomics Bioinformatics* 4: 259-263.
6. Wang D, Zhang Y, Zhang Z, Zhu J, Yu J (2010) KaKs\_Calculator 2.0: a toolkit incorporating gamma-series methods and sliding window strategies. *Genomics Proteomics Bioinformatics* 8: 77-80.
